# Supplementary material
Source: PubMed Central journal article supplement (PMC5996379)
Supplement: NIHMS886994-supplement-Supplemental_tables.pdf [file NIHMS886994-supplement-Supplemental_tables.pdf]

**Web Table 1.** Sensitivity and specificity of tuberculosis recent transmission (RT) estimates using the state-based clustering, SaTScan-based clustering, and county-based clustering methods, and accuracy of estimates across a range of plausible hypothetical RT prevalence rates, including cases classified as “possible RT” in the “field evidence of RT” group, Arkansas, Maryland, and Massachusetts, January 1, 1998–September 30, 2000 ( $n = 1,188$ )

| RT Estimation Method     | No. of True-Positive Cases | No. of False-Positive Cases | No. of True-Negative Cases | No. of False-Negative Cases | Sensitivity (%) | Specificity (%) | Accuracy (%) by Hypothetical RT Prevalence |      |      |      |      |      |
|--------------------------|----------------------------|-----------------------------|----------------------------|-----------------------------|-----------------|-----------------|--------------------------------------------|------|------|------|------|------|
|                          |                            |                             |                            |                             |                 |                 | 10%                                        | 15%  | 20%  | 25%  | 30%  | 50%  |
| State-based clustering   | 136                        | 129                         | 884                        | 39                          | 77.7            | 87.3            | 86.3                                       | 85.8 | 85.4 | 84.9 | 84.4 | 82.5 |
| SaTScan-based clustering | 98                         | 53                          | 960                        | 77                          | 56.0            | 94.8            | 90.9                                       | 89.0 | 87.0 | 85.1 | 83.1 | 75.4 |
| County-based clustering  | 104                        | 68                          | 945                        | 71                          | 59.4            | 93.3            | 89.9                                       | 88.2 | 86.5 | 84.8 | 83.1 | 76.4 |

**Web Table 2.** Sensitivity and specificity of plausible-source case recent transmission (RT) estimation approach across distances varying from 0 to 500 miles (800 km), and accuracy of estimates across a range of plausible hypothetical RT prevalence rates, including cases classified as “possible RT” in the “field evidence of RT” group, Arkansas, Maryland, and Massachusetts, January 1, 1998–September 30 ( $n = 1,188$ )

| Distance (miles) | No. of True-Positive Cases | No. of False-Positive Cases | No. of True-Negative Cases | No. of False-Negative Cases | Sensitivity (%) | Specificity (%) | Accuracy (%) by Hypothetical RT Prevalence |      |      |      |      |      |
|------------------|----------------------------|-----------------------------|----------------------------|-----------------------------|-----------------|-----------------|--------------------------------------------|------|------|------|------|------|
|                  |                            |                             |                            |                             |                 |                 | 10%                                        | 15%  | 20%  | 25%  | 30%  | 50%  |
| 0                | 0                          | 0                           | 1013                       | 175                         | 0.0             | 100.0           | 90.0                                       | 85.0 | 80.0 | 75.0 | 70.0 | 50.0 |
| 1                | 47                         | 18                          | 995                        | 128                         | 26.9            | 98.2            | 91.1                                       | 87.5 | 83.9 | 80.4 | 76.8 | 62.5 |
| 5                | 77                         | 36                          | 977                        | 98                          | 44.0            | 96.4            | 91.2                                       | 88.6 | 86.0 | 83.3 | 80.7 | 70.2 |
| 10               | 85                         | 50                          | 963                        | 90                          | 48.6            | 95.1            | 90.4                                       | 88.1 | 85.8 | 83.4 | 81.1 | 71.8 |
| 20               | 93                         | 65                          | 948                        | 82                          | 53.1            | 93.6            | 89.5                                       | 87.5 | 85.5 | 83.5 | 81.5 | 73.4 |
| 31               | 96                         | 73                          | 940                        | 79                          | 54.9            | 92.8            | 89.0                                       | 87.1 | 85.2 | 83.3 | 81.4 | 73.8 |
| 50               | 100                        | 82                          | 931                        | 75                          | 57.1            | 91.9            | 88.4                                       | 86.7 | 85.0 | 83.2 | 81.5 | 74.5 |
| 60               | 100                        | 84                          | 929                        | 75                          | 57.1            | 91.7            | 88.3                                       | 86.5 | 84.8 | 83.1 | 81.3 | 74.4 |
| 75               | 102                        | 89                          | 924                        | 73                          | 58.3            | 91.2            | 87.9                                       | 86.3 | 84.6 | 83.0 | 81.3 | 74.7 |
| 100              | 104                        | 93                          | 920                        | 71                          | 59.4            | 90.8            | 87.7                                       | 86.1 | 84.5 | 83.0 | 81.4 | 75.1 |
| 200              | 106                        | 94                          | 919                        | 69                          | 60.6            | 90.7            | 87.7                                       | 86.2 | 84.7 | 83.2 | 81.7 | 75.6 |
| 300              | 106                        | 97                          | 916                        | 69                          | 60.6            | 90.4            | 87.4                                       | 85.9 | 84.5 | 83.0 | 81.5 | 75.5 |
| 500              | 106                        | 97                          | 916                        | 69                          | 60.6            | 90.4            | 87.4                                       | 85.9 | 84.5 | 83.0 | 81.5 | 75.5 |

**Web Table 3.** Sensitivity and specificity of tuberculosis recent transmission (RT) estimates using the state-based clustering, SaTScan-based clustering, and county-based clustering methods, and accuracy of estimates across a range of plausible hypothetical RT prevalence rates, including cases classified as “possible RT” in the “no field evidence of RT” group, Arkansas, Maryland, and Massachusetts, January 1, 1998–September 30, 2000 ( $n = 1,188$ )

| RT Estimation Method     | No. of True-Positive Cases | No. of False-Positive Cases | No. of True-Negative Cases | No. of False-Negative Cases | Sensitivity (%) | Specificity (%) | Accuracy (%) by Hypothetical RT Prevalence |      |      |      |      |      |
|--------------------------|----------------------------|-----------------------------|----------------------------|-----------------------------|-----------------|-----------------|--------------------------------------------|------|------|------|------|------|
|                          |                            |                             |                            |                             |                 |                 | 10%                                        | 15%  | 20%  | 25%  | 30%  | 50%  |
| State-based clustering   | 72                         | 193                         | 923                        | 0                           | 100.0           | 82.7            | 84.4                                       | 85.3 | 86.2 | 87.0 | 87.9 | 91.4 |
| SaTScan-based clustering | 58                         | 93                          | 1023                       | 14                          | 80.6            | 91.7            | 90.6                                       | 90.0 | 89.4 | 88.9 | 88.3 | 86.1 |
| County-based clustering  | 58                         | 114                         | 1002                       | 14                          | 80.6            | 89.8            | 88.9                                       | 88.4 | 87.9 | 87.5 | 87.0 | 85.2 |

**Web Table 4.** Sensitivity and specificity of plausible-source case recent transmission (RT) estimation approach across distances varying from 0 to 500 miles (800 km), and accuracy of estimates across a range of plausible hypothetical RT prevalence rates, including cases classified as “possible RT” in the “no field evidence of RT” group, Arkansas, Maryland, and Massachusetts, January 1, 1998–September 30, 2000 ( $n = 1,188$ )

| Distance (miles) | No. of True-Positive Cases | No. of False-Positive Cases | No. of True-Negative Cases | No. of False-Negative Cases | Sensitivity (%) | Specificity (%) | Accuracy (%) by Hypothetical RT Prevalence |      |      |      |      |      |
|------------------|----------------------------|-----------------------------|----------------------------|-----------------------------|-----------------|-----------------|--------------------------------------------|------|------|------|------|------|
|                  |                            |                             |                            |                             |                 |                 | 10%                                        | 15%  | 20%  | 25%  | 30%  | 50%  |
| 0                | 0                          | 0                           | 1116                       | 72                          | 0.0             | 100.0           | 90.0                                       | 85.0 | 80.0 | 75.0 | 70.0 | 50.0 |
| 1                | 39                         | 26                          | 1090                       | 33                          | 54.2            | 97.7            | 93.3                                       | 91.1 | 89.0 | 86.8 | 84.6 | 75.9 |
| 5                | 58                         | 55                          | 1061                       | 14                          | 80.6            | 95.1            | 93.6                                       | 92.9 | 92.2 | 91.4 | 90.7 | 87.8 |
| 10               | 64                         | 71                          | 1045                       | 8                           | 88.9            | 93.6            | 93.2                                       | 92.9 | 92.7 | 92.5 | 92.2 | 91.3 |
| 20               | 65                         | 93                          | 1023                       | 7                           | 90.3            | 91.7            | 91.5                                       | 91.5 | 91.4 | 91.3 | 91.3 | 91.0 |
| 31               | 65                         | 104                         | 1012                       | 7                           | 90.3            | 90.7            | 90.6                                       | 90.6 | 90.6 | 90.6 | 90.6 | 90.5 |
| 50               | 68                         | 114                         | 1002                       | 4                           | 94.4            | 89.8            | 90.3                                       | 90.5 | 90.7 | 90.9 | 91.2 | 92.1 |
| 60               | 68                         | 116                         | 1000                       | 4                           | 94.4            | 89.6            | 90.1                                       | 90.3 | 90.6 | 90.8 | 91.1 | 92.0 |
| 75               | 69                         | 122                         | 994                        | 3                           | 95.8            | 89.1            | 89.7                                       | 90.1 | 90.4 | 90.8 | 91.1 | 92.5 |
| 100              | 69                         | 128                         | 988                        | 3                           | 95.8            | 88.5            | 89.3                                       | 89.6 | 90.0 | 90.4 | 90.7 | 92.2 |
| 200              | 70                         | 130                         | 986                        | 2                           | 97.2            | 88.4            | 89.2                                       | 89.7 | 90.1 | 90.6 | 91.0 | 92.8 |
| 300              | 70                         | 133                         | 983                        | 2                           | 97.2            | 88.1            | 89.0                                       | 89.5 | 89.9 | 90.4 | 90.8 | 92.7 |
| 500              | 70                         | 133                         | 983                        | 2                           | 97.2            | 88.1            | 89.0                                       | 89.5 | 89.9 | 90.4 | 90.8 | 92.7 |

**Web Table 5.** Sensitivity and specificity of plausible-source case recent transmission (RT) estimation approach across distances varying from 0 to 500 miles (800 km), and accuracy of estimates across a range of plausible hypothetical RT prevalence rates, allowing foreign-born cases diagnosed <100 days after arrival to the United States to be classified as attributable to RT if a plausible-source case was identified, Arkansas, Maryland, and Massachusetts, January 1, 1998–September 30 (*n* = 1,085)

| Distance (miles) | No. of True-Positive Cases | No. of False-Positive Cases | No. of True-Negative Cases | No. of False-Negative Cases | Sensitivity (%) | Specificity (%) | Accuracy (%) by Hypothetical RT Prevalence |      |      |      |      |      |
|------------------|----------------------------|-----------------------------|----------------------------|-----------------------------|-----------------|-----------------|--------------------------------------------|------|------|------|------|------|
|                  |                            |                             |                            |                             |                 |                 | 10%                                        | 15%  | 20%  | 25%  | 30%  | 50%  |
| 0                | 0                          | 0                           | 1013                       | 72                          | 0.0             | 100.0           | 90.0                                       | 85.0 | 80.0 | 75.0 | 70.0 | 50.0 |
| 1                | 39                         | 20                          | 993                        | 33                          | 54.2            | 98.0            | 93.6                                       | 91.4 | 89.3 | 87.1 | 84.9 | 76.1 |
| 5                | 58                         | 37                          | 976                        | 14                          | 80.6            | 96.3            | 94.8                                       | 94.0 | 93.2 | 92.4 | 91.6 | 88.5 |
| 10               | 64                         | 52                          | 961                        | 8                           | 88.9            | 94.9            | 94.3                                       | 94.0 | 93.7 | 93.4 | 93.1 | 91.9 |
| 20               | 65                         | 68                          | 945                        | 7                           | 90.3            | 93.3            | 93.0                                       | 92.8 | 92.7 | 92.5 | 92.4 | 91.8 |
| 31               | 65                         | 76                          | 937                        | 7                           | 90.3            | 92.5            | 92.3                                       | 92.2 | 92.1 | 91.9 | 91.8 | 91.4 |
| 50               | 68                         | 85                          | 928                        | 4                           | 94.4            | 91.6            | 91.9                                       | 92.0 | 92.2 | 92.3 | 92.5 | 93.0 |
| 60               | 68                         | 87                          | 926                        | 4                           | 94.4            | 91.4            | 91.7                                       | 91.9 | 92.0 | 92.2 | 92.3 | 92.9 |
| 75               | 69                         | 92                          | 921                        | 3                           | 95.8            | 90.9            | 91.4                                       | 91.7 | 91.9 | 92.1 | 92.4 | 93.4 |
| 100              | 69                         | 96                          | 917                        | 3                           | 95.8            | 90.5            | 91.1                                       | 91.3 | 91.6 | 91.9 | 92.1 | 93.2 |
| 200              | 70                         | 97                          | 916                        | 2                           | 97.2            | 90.4            | 91.1                                       | 91.4 | 91.8 | 92.1 | 92.5 | 93.8 |
| 300              | 70                         | 100                         | 913                        | 2                           | 97.2            | 90.1            | 90.8                                       | 91.2 | 91.5 | 91.9 | 92.3 | 93.7 |
| 500              | 70                         | 108                         | 905                        | 2                           | 97.2            | 89.3            | 90.1                                       | 90.5 | 90.9 | 91.3 | 91.7 | 93.3 |

## WEB APPENDIX

We evaluated the impact of defining recent transmission as transmission between cases diagnosed within a 1 year period rather than 2 year period (Web Table 6 and Web Table 7). For this sensitivity analysis, we defined state-based clustering, SaTScan-based clustering, and county-based clustering identically to our main analysis (as there is no time component to these methods). For our gold standard of “field evidence of RT,” we used a 1 year threshold, defining this as a case of TB disease with an identified source case (i.e. epidemiologic link between 2 cases and known direction of transmission), where the source case was diagnosed between 1 year before and any time following the diagnosis date of the given case, and the cases had matching RFLP patterns. For our plausible-source case approach, we modified the algorithm to require that a plausible-source case be diagnosed within 1 year prior. The plausible-source case approach was designed to incorporate the time frame of recent transmission explicitly, so this modification was warranted.

**Web Table 6.** Sensitivity and specificity of tuberculosis recent transmission (RT) estimates using the state-based clustering, SaTScan-based clustering, and county-based clustering methods, and accuracy of estimates across a range of plausible hypothetical RT prevalence rates, defining recent transmission as transmission occurring within 1 year before the diagnosis of a reported case, Arkansas, Maryland, and Massachusetts, January 1, 1998–September 30, 2000 ( $n = 1085$ )

| RT Estimation Method     | No. of True-Positive Cases | No. of False-Positive Cases | No. of True-Negative Cases | No. of False-Negative Cases | Sensitivity (%) | Specificity (%) | Accuracy (%) by Hypothetical RT Prevalence |      |      |      |      |      |
|--------------------------|----------------------------|-----------------------------|----------------------------|-----------------------------|-----------------|-----------------|--------------------------------------------|------|------|------|------|------|
|                          |                            |                             |                            |                             |                 |                 | 10%                                        | 15%  | 20%  | 25%  | 30%  | 50%  |
| State-based clustering   | 53                         | 148                         | 884                        | 0                           | 100.0           | 85.7            | 87.1                                       | 87.8 | 88.5 | 89.2 | 90.0 | 92.8 |
| SaTScan-based clustering | 40                         | 71                          | 961                        | 13                          | 75.5            | 93.1            | 91.4                                       | 90.5 | 89.6 | 88.7 | 87.8 | 84.3 |
| County-based clustering  | 41                         | 85                          | 947                        | 12                          | 77.4            | 91.8            | 90.3                                       | 89.6 | 88.9 | 88.2 | 87.4 | 84.6 |

**Web Table 7.** Sensitivity and specificity of plausible-source case recent transmission (RT) estimation approach across distances varying from 0 to 500 miles (800 km), and accuracy of estimates across a range of plausible hypothetical RT prevalence rates, defining recent transmission as transmission occurring within 1 year before the diagnosis of a reported case, Arkansas, Maryland, and Massachusetts, January 1, 1998–September 30, 2000 ( $n = 1,085$ )

| Distance (miles) | No. of True-Positive Cases | No. of False-Positive Cases | No. of True-Negative Cases | No. of False-Negative Cases | Sensitivity (%) | Specificity (%) | Accuracy (%) by Hypothetical RT Prevalence |      |      |      |      |      |
|------------------|----------------------------|-----------------------------|----------------------------|-----------------------------|-----------------|-----------------|--------------------------------------------|------|------|------|------|------|
|                  |                            |                             |                            |                             |                 |                 | 10%                                        | 15%  | 20%  | 25%  | 30%  | 50%  |
| 0                | 0                          | 0                           | 1032                       | 53                          | 0.0             | 100.0           | 90.0                                       | 85.0 | 80.0 | 75.0 | 70.0 | 50.0 |
| 1                | 27                         | 15                          | 1017                       | 26                          | 50.9            | 98.5            | 93.8                                       | 91.4 | 89.0 | 86.6 | 84.3 | 74.7 |
| 5                | 42                         | 28                          | 1004                       | 11                          | 79.2            | 97.3            | 95.5                                       | 94.6 | 93.7 | 92.8 | 91.9 | 88.3 |
| 10               | 46                         | 40                          | 992                        | 7                           | 86.8            | 96.1            | 95.2                                       | 94.7 | 94.3 | 93.8 | 93.3 | 91.5 |
| 20               | 47                         | 50                          | 982                        | 6                           | 88.7            | 95.2            | 94.5                                       | 94.2 | 93.9 | 93.5 | 93.2 | 91.9 |
| 31               | 47                         | 53                          | 979                        | 6                           | 88.7            | 94.9            | 94.2                                       | 93.9 | 93.6 | 93.3 | 93.0 | 91.8 |
| 50               | 50                         | 60                          | 972                        | 3                           | 94.3            | 94.2            | 94.2                                       | 94.2 | 94.2 | 94.2 | 94.2 | 94.3 |
| 60               | 50                         | 63                          | 969                        | 3                           | 94.3            | 93.9            | 93.9                                       | 94.0 | 94.0 | 94.0 | 94.0 | 94.1 |
| 75               | 50                         | 64                          | 968                        | 3                           | 94.3            | 93.8            | 93.9                                       | 93.9 | 93.9 | 93.9 | 94.0 | 94.1 |
| 100              | 50                         | 65                          | 967                        | 3                           | 94.3            | 93.7            | 93.8                                       | 93.8 | 93.8 | 93.9 | 93.9 | 94.0 |
| 200              | 51                         | 69                          | 963                        | 2                           | 96.2            | 93.3            | 93.6                                       | 93.8 | 93.9 | 94.0 | 94.2 | 94.8 |
| 300              | 51                         | 70                          | 962                        | 2                           | 96.2            | 93.2            | 93.5                                       | 93.7 | 93.8 | 94.0 | 94.1 | 94.7 |
| 500              | 51                         | 74                          | 958                        | 2                           | 96.2            | 92.8            | 93.2                                       | 93.3 | 93.5 | 93.7 | 93.8 | 94.5 |

**Web Table 8.** Sensitivity and specificity of tuberculosis recent transmission (RT) estimates using the state-based clustering, SaTScan-based clustering, and county-based clustering methods, and accuracy of estimates across a range of plausible hypothetical RT prevalence rates, restricted to U.S.-born cases, Arkansas, Maryland, and Massachusetts, January 1, 1998–September 30, 2000 ( $n = 548$ )

| RT Estimation Method     | No. of True-Positive Cases | No. of False-Positive Cases | No. of True-Negative Cases | No. of False-Negative Cases | Sensitivity (%) | Specificity (%) | Accuracy (%) by Hypothetical RT Prevalence |      |      |      |      |      |
|--------------------------|----------------------------|-----------------------------|----------------------------|-----------------------------|-----------------|-----------------|--------------------------------------------|------|------|------|------|------|
|                          |                            |                             |                            |                             |                 |                 | 10%                                        | 15%  | 20%  | 25%  | 30%  | 50%  |
| State-based clustering   | 60                         | 92                          | 396                        | 0                           | 100             | 81.1            | 83.0                                       | 84.0 | 84.9 | 85.9 | 86.8 | 90.6 |
| SaTScan-based clustering | 47                         | 32                          | 456                        | 13                          | 78.3            | 93.4            | 91.9                                       | 91.2 | 90.4 | 89.7 | 88.9 | 85.9 |
| County-based clustering  | 48                         | 86                          | 442                        | 12                          | 80.0            | 90.6            | 89.5                                       | 88.9 | 88.5 | 87.9 | 87.4 | 85.3 |



**Web Table 9.** Sensitivity and specificity of plausible-source case recent transmission (RT) estimation approach across distances varying from 0 to 500 miles (800 km), and accuracy of estimates across a range of plausible hypothetical RT prevalence rates, restricted to U.S.-born cases, Arkansas, Maryland, and Massachusetts, January 1, 1998–September 30, 2000 (*n* = 548)

| Distance (miles) | No. of True-Positive Cases | No. of False-Positive Cases | No. of True-Negative Cases | No. of False-Negative Cases | Sensitivity (%) | Specificity (%) | Accuracy (%) by Hypothetical RT Prevalence |      |      |      |      |      |
|------------------|----------------------------|-----------------------------|----------------------------|-----------------------------|-----------------|-----------------|--------------------------------------------|------|------|------|------|------|
|                  |                            |                             |                            |                             |                 |                 | 10%                                        | 15%  | 20%  | 25%  | 30%  | 50%  |
| 0                | 0                          | 0                           | 488                        | 60                          | 0.0             | 100.0           | 90.0                                       | 85.0 | 80.0 | 75.0 | 70.0 | 50.0 |
| 1                | 32                         | 16                          | 472                        | 28                          | 53.3            | 96.7            | 92.4                                       | 90.2 | 88.0 | 85.9 | 83.7 | 75.0 |
| 5                | 50                         | 31                          | 457                        | 10                          | 83.3            | 93.6            | 92.6                                       | 92.1 | 91.6 | 91.1 | 90.6 | 88.5 |
| 10               | 53                         | 43                          | 445                        | 7                           | 88.3            | 91.2            | 90.9                                       | 90.8 | 90.6 | 90.5 | 90.3 | 89.8 |
| 20               | 54                         | 54                          | 434                        | 6                           | 90.0            | 88.9            | 89.0                                       | 89.1 | 89.1 | 89.2 | 89.3 | 89.5 |
| 31               | 54                         | 59                          | 429                        | 6                           | 90.0            | 87.9            | 88.1                                       | 88.2 | 88.3 | 88.4 | 88.5 | 89.0 |
| 50               | 57                         | 66                          | 422                        | 3                           | 95.0            | 86.5            | 87.3                                       | 87.8 | 88.2 | 88.6 | 89.0 | 90.7 |
| 60               | 57                         | 68                          | 420                        | 3                           | 95.0            | 86.1            | 87.0                                       | 87.4 | 87.9 | 88.3 | 88.7 | 90.5 |
| 75               | 58                         | 73                          | 415                        | 2                           | 96.7            | 85.0            | 86.2                                       | 86.8 | 87.4 | 87.9 | 88.5 | 90.9 |
| 100              | 58                         | 77                          | 411                        | 2                           | 96.7            | 84.2            | 85.5                                       | 86.1 | 86.7 | 87.3 | 88.0 | 90.4 |
| 200              | 59                         | 78                          | 410                        | 1                           | 98.3            | 84.0            | 85.4                                       | 86.2 | 86.9 | 87.6 | 88.3 | 91.2 |
| 300              | 59                         | 81                          | 407                        | 1                           | 98.3            | 83.4            | 84.9                                       | 85.6 | 86.4 | 87.1 | 87.9 | 90.9 |
| 500              | 59                         | 81                          | 407                        | 1                           | 98.3            | 83.4            | 84.9                                       | 85.6 | 86.4 | 87.1 | 87.9 | 90.9 |

**Web Table 10.** Sensitivity and specificity of tuberculosis recent transmission (RT) estimates using the state-based clustering, SaTScan-based clustering, and county-based clustering methods, and accuracy of estimates across a range of plausible hypothetical RT prevalence rates, restricted to foreign-born cases, Arkansas, Maryland, and Massachusetts, January 1, 1998–September 30, 2000 ( $n = 534$ )

| RT Estimation Method     | No. of True-Positive Cases | No. of False-Positive Cases | No. of True-Negative Cases | No. of False-Negative Cases | Sensitivity (%) | Specificity (%) | Accuracy (%) by Hypothetical RT Prevalence |      |      |      |      |      |
|--------------------------|----------------------------|-----------------------------|----------------------------|-----------------------------|-----------------|-----------------|--------------------------------------------|------|------|------|------|------|
|                          |                            |                             |                            |                             |                 |                 | 10%                                        | 15%  | 20%  | 25%  | 30%  | 50%  |
| State-based clustering   | 11                         | 37                          | 486                        | 0                           | 100             | 92.9            | 93.6                                       | 94.0 | 94.3 | 94.7 | 95.0 | 96.5 |
| SaTScan-based clustering | 10                         | 21                          | 502                        | 1                           | 90.9            | 96.0            | 95.5                                       | 95.2 | 95.0 | 94.7 | 94.5 | 93.4 |
| County-based clustering  | 9                          | 22                          | 501                        | 2                           | 81.8            | 95.8            | 94.4                                       | 93.7 | 93.0 | 92.3 | 91.6 | 88.8 |

**Web Table 11.** Sensitivity and specificity of plausible-source case recent transmission (RT) estimation approach across distances varying from 0 to 500 miles (800 km), and accuracy of estimates across a range of plausible hypothetical RT prevalence rates, restricted to foreign-born cases, Arkansas, Maryland, and Massachusetts, January 1, 1998–September 30, 2000 ( $n = 534$ )

| Distance (miles) | No. of True-Positive Cases | No. of False-Positive Cases | No. of True-Negative Cases | No. of False-Negative Cases | Sensitivity (%) | Specificity (%) | Accuracy (%) by Hypothetical RT Prevalence |      |      |      |      |      |
|------------------|----------------------------|-----------------------------|----------------------------|-----------------------------|-----------------|-----------------|--------------------------------------------|------|------|------|------|------|
|                  |                            |                             |                            |                             |                 |                 | 10%                                        | 15%  | 20%  | 25%  | 30%  | 50%  |
| 0                | 0                          | 0                           | 523                        | 11                          | 0.0             | 100.0           | 90.0                                       | 85.0 | 80.0 | 75.0 | 70.0 | 50.0 |
| 1                | 6                          | 2                           | 521                        | 5                           | 54.5            | 99.6            | 95.1                                       | 92.9 | 90.6 | 88.3 | 86.1 | 77.1 |
| 5                | 7                          | 5                           | 518                        | 4                           | 63.6            | 99.0            | 95.5                                       | 93.7 | 92.0 | 90.2 | 88.4 | 81.3 |
| 10               | 10                         | 7                           | 516                        | 1                           | 90.9            | 98.7            | 97.9                                       | 97.5 | 97.1 | 96.7 | 96.3 | 94.8 |
| 20               | 10                         | 11                          | 512                        | 1                           | 90.9            | 97.9            | 97.2                                       | 96.8 | 96.5 | 96.1 | 95.8 | 94.4 |
| 31               | 10                         | 14                          | 509                        | 1                           | 90.9            | 97.3            | 96.7                                       | 96.4 | 96.0 | 95.7 | 95.4 | 94.1 |
| 50               | 10                         | 16                          | 507                        | 1                           | 90.9            | 96.9            | 96.3                                       | 96.0 | 95.7 | 95.4 | 95.1 | 93.9 |
| 60               | 10                         | 16                          | 507                        | 1                           | 90.9            | 96.9            | 96.3                                       | 96.0 | 95.7 | 95.4 | 95.1 | 93.9 |
| 75               | 10                         | 16                          | 507                        | 1                           | 90.9            | 96.9            | 96.3                                       | 96.0 | 95.7 | 95.4 | 95.1 | 93.9 |
| 100              | 10                         | 16                          | 507                        | 1                           | 90.9            | 96.9            | 96.3                                       | 96.0 | 95.7 | 95.4 | 95.1 | 93.9 |
| 200              | 10                         | 16                          | 507                        | 1                           | 90.9            | 96.9            | 96.3                                       | 96.0 | 95.7 | 95.4 | 95.1 | 93.9 |
| 300              | 10                         | 16                          | 507                        | 1                           | 90.9            | 96.9            | 96.3                                       | 96.0 | 95.7 | 95.4 | 95.1 | 93.9 |
| 500              | 10                         | 16                          | 507                        | 1                           | 90.9            | 96.9            | 96.3                                       | 96.0 | 95.7 | 95.4 | 95.1 | 93.9 |
